# Supplementary material for: BactoSpin: Novel Technology for Rapid Bacteria Detection and Antibiotic Susceptibility Testing
Source: Sensors (Basel). 2021 Sep 2;21(17):5902. doi: 10.3390/s21175902 (PMC8434515; doi:10.3390/s21175902)
Supplement: Supplementary file 1 [file sensors-21-05902-s001.zip]

Archive with 7 entries (7 files):
- sensors-1353088-supplementary.pdf
- Video S1.mp4
- Video S2.mp4
- Video S3.mp4
- Video S4.mp4
- Video S5.mp4
- Video S6.mp4
